# Supplementary material for: An application of miniaturized electrochemical sensing for determination of arsenic in herbal medicines
Source: Royal Society of Chemistry journal article supplement (doi:10.1039/d2ay00782g), 2022-01-01
Supplement: d2ay00782g1.pdf [file d2ay00782g1.pdf]

## Supplementary information

### **An application of miniaturized electrochemical sensing for determination of arsenic in herbal medicines**

Wisarut Khamcharoen,<sup>1</sup> Phichanan Duchda,<sup>2</sup> Kriangsak Songsrirote,<sup>1</sup> Nuanlaorr  
Ratanawimarnwong,<sup>1</sup> Nunticha Limchoowong,<sup>1</sup> Piyada Jittangprasert,<sup>1</sup> Thitirat Mantim,<sup>1</sup>  
Weena Siangproh,<sup>1\*</sup>

<sup>1</sup> Center of Excellence in Agricultural Innovation and Food Safety, Faculty of Science,  
Srinakharinwirot University, Sukhumvit 23, Wattana, Bangkok 10110, Thailand

<sup>2</sup> Electrochemistry and Optical Spectroscopy Center of Excellence, Department of Chemistry,  
Faculty of Science, Chulalongkorn University, Pathumwan, Bangkok 10330, Thailand

\*Corresponding author:

E-mail address: [weena@g.swu.ac.th](mailto:weena@g.swu.ac.th), [weenasi@hotmail.com](mailto:weenasi@hotmail.com)

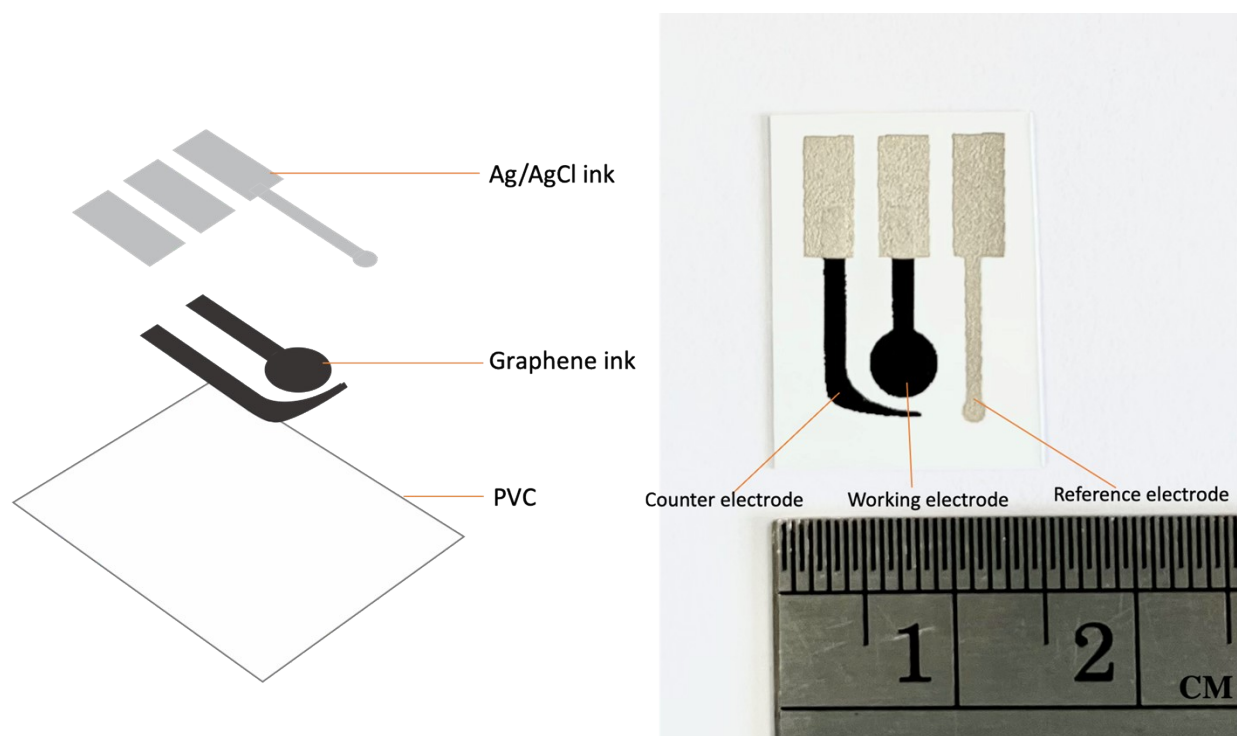

Figure S1 The components of in-house screen-printed graphene electrode.

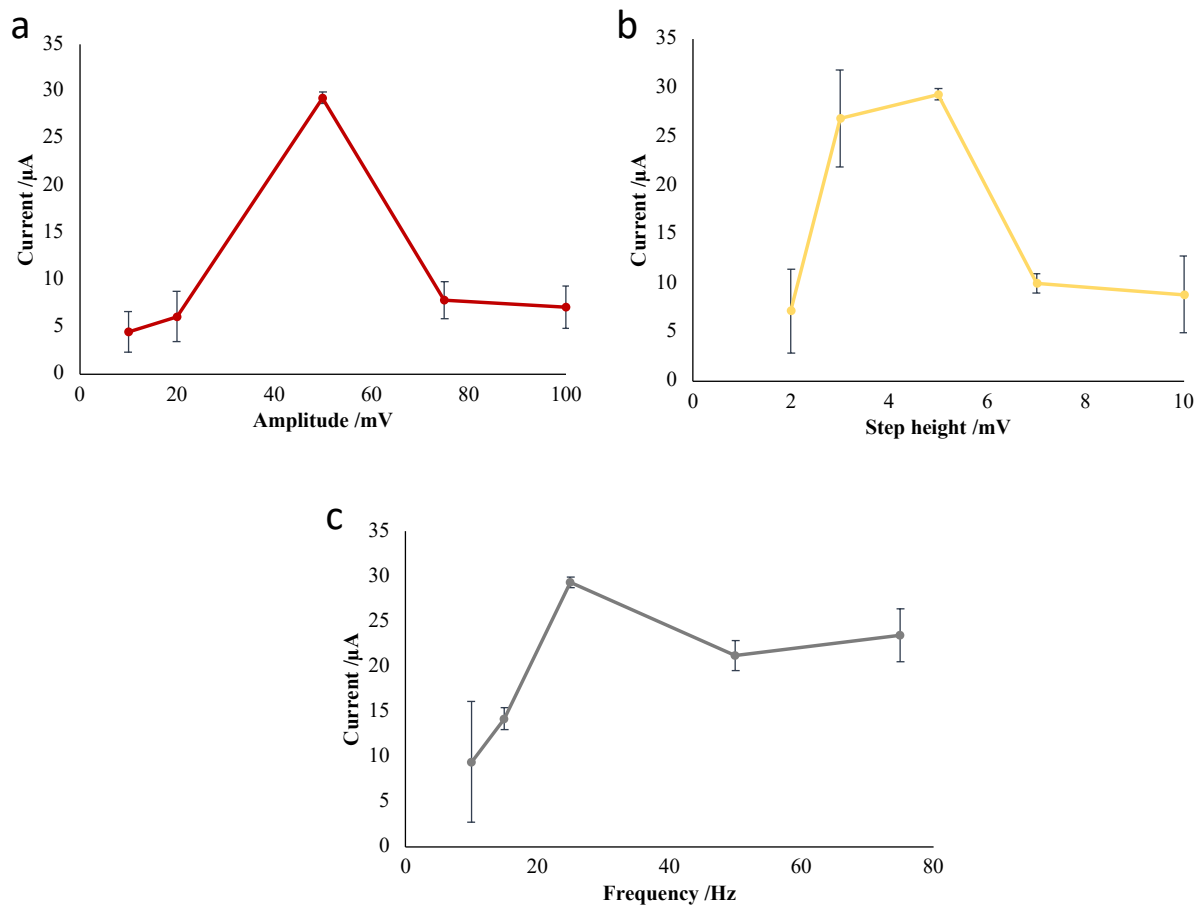

Figure S2 The effect of (a) amplitude (b) step height and (c) frequency of square wave voltammetry.

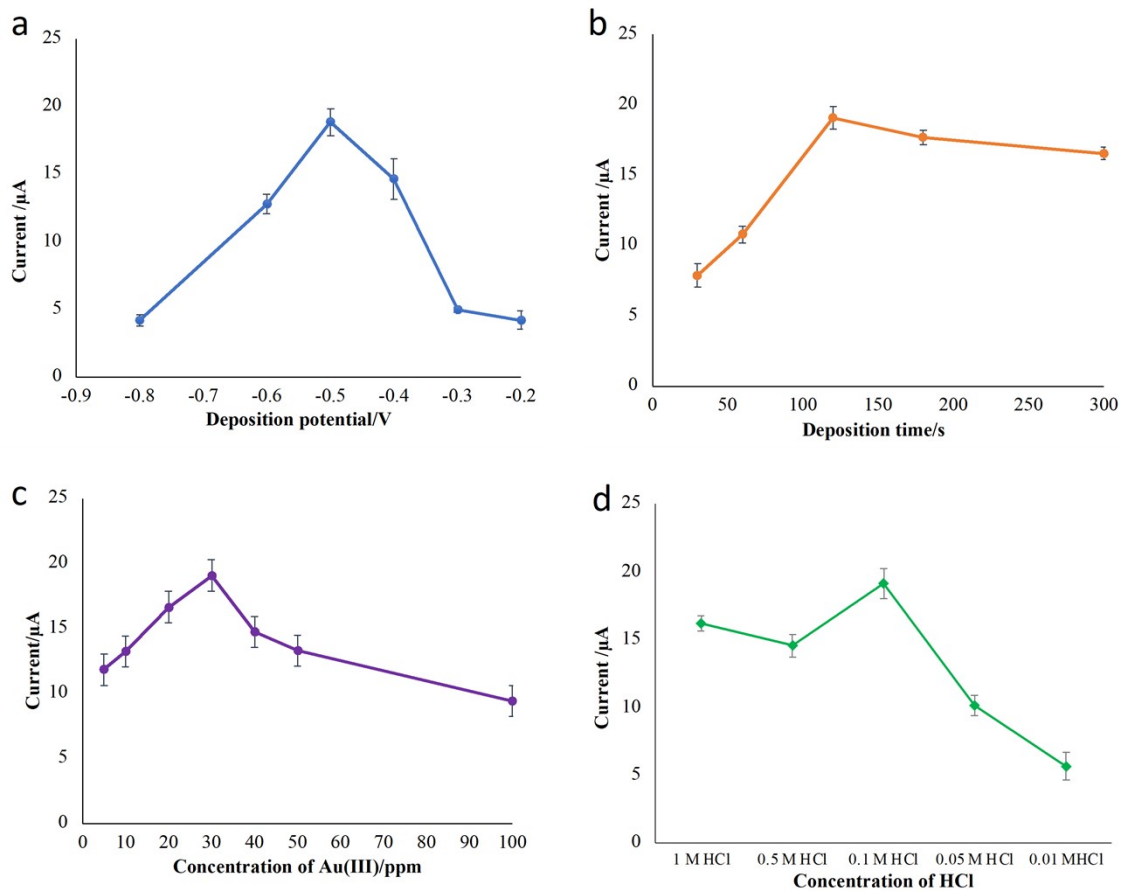

Figure S3 The effect of (a) deposition potential (b) deposition time (c) concentration of Au(III) and (d) concentration of HCl (electrolyte)

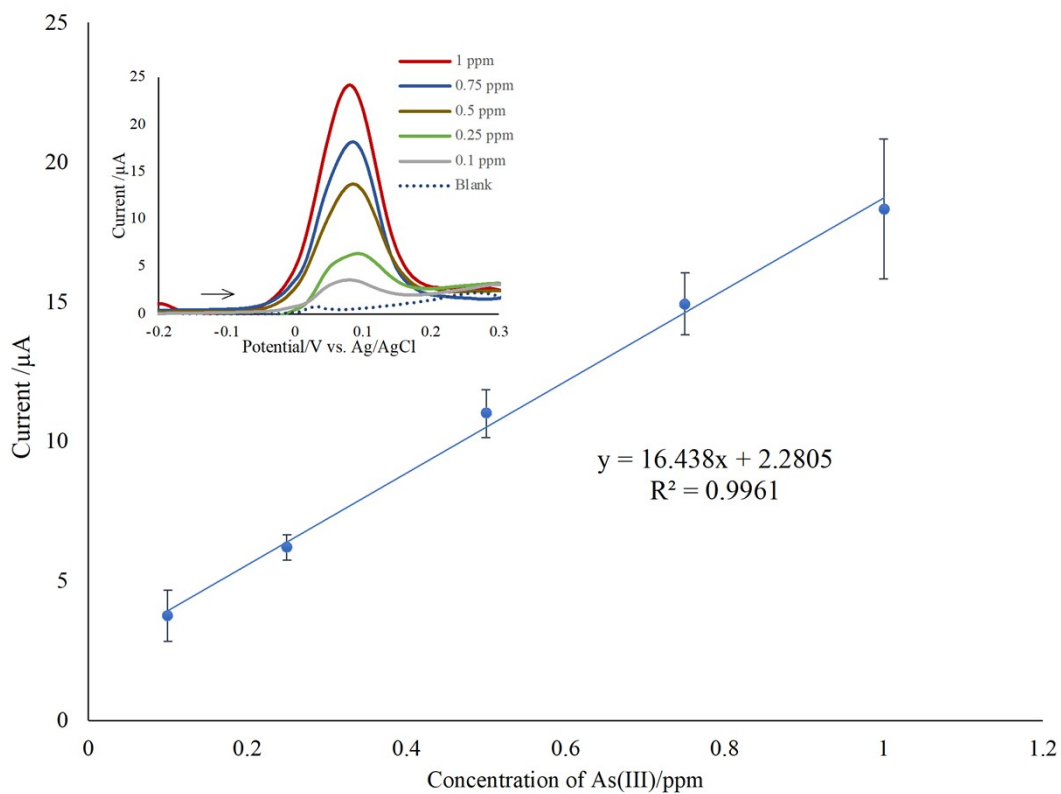

Figure S4 The calibration curve of As(III) concentrations and current responses at low concentration from 0.1 to 1.0 ppm. And Inset shows square wave voltammograms of As(III) at 0.1–1.0 ppm.

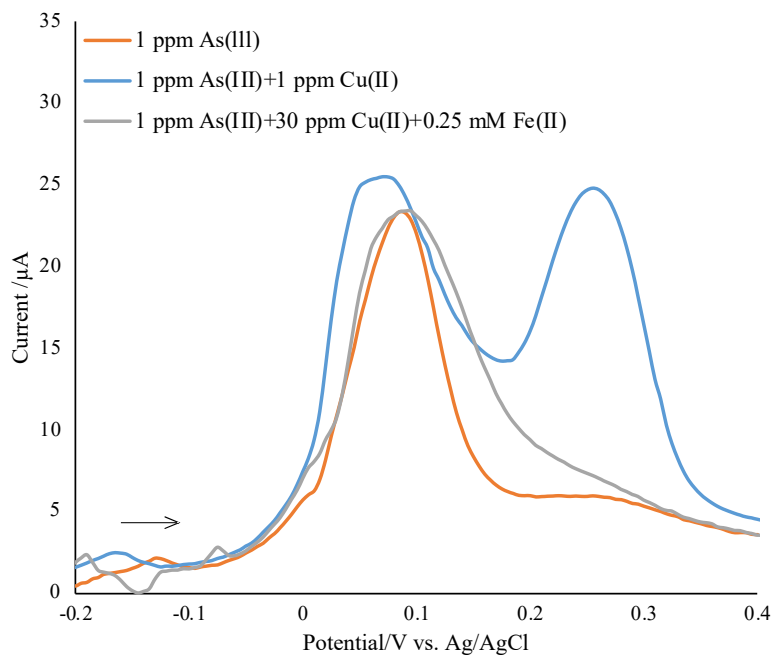

Figure S5 Square wave voltammograms of 1 ppm As(III) (orange line), 1 ppm As(III) in the presence of 1 ppm Cu<sup>2+</sup> (blue line) and 1 ppm As(III) in the presence of 30 ppm Cu<sup>2+</sup> with 0.25 mM Fe<sup>2+</sup> (grey line) in 0.1 M HCl.
